# Supplementary material for: Identification of Francisella tularensis Subspecies in a Clinical Setting Using MALDI-TOF MS: An In-House Francisella Library and Biomarkers
Source: MDPI journal article supplement (doi:10.3390/microorganisms11040905), 2023-03-30
Supplement: s1 [file s1]

Supplementary Table S3. Selected biomarker masses matched with genes of possible proteins

| Selected biomarker (m/z value)       | Matching protein <sup>a</sup>                | Gene code         | Strain     | Accession number Protein protein / genome <sup>b</sup> | Charges (z-values) | theoretical posttranslational corrections |
|--------------------------------------|----------------------------------------------|-------------------|------------|--------------------------------------------------------|--------------------|-------------------------------------------|
| 2195                                 | 50S ribosomal protein L36                    | 50S-L36           | FSC 147    | ACD31328 / CP00915                                     | +2                 | none                                      |
| 3101                                 | 50S ribosomal protein L33                    | 50S-L33           | TOBA-04    | AFJ42863 / CP003402                                    | +2                 | none                                      |
| 3128                                 | Hypothetical protein                         | HypProt           | FSC 774    | HypProt <sup>cb</sup> / CP053850                       |                    | Plus methyl                               |
| 3679                                 | Coldshock DNA-binding proteins               | ColdShockP        | TOBA-04    | AFJ43499 / CP003402                                    | +2                 | none                                      |
|                                      |                                              |                   |            | AFJ43802 / CP003402                                    |                    |                                           |
| 3880-3881                            | 50S ribosomal protein L29                    | 50S-L29           | CCUG 19701 | ABZ86979 / CP000937                                    | +2                 | none                                      |
| 4040                                 | Unknown mass                                 | UNK               | Fl27       | unkown                                                 |                    | none                                      |
| 4387                                 | BolA-like protein                            | BolA              | CCUG 60119 | AJC48275 / CP010427                                    | +2                 | none                                      |
| 4455                                 | 50S ribosomal protein L27                    | 50S-L27           | LVS        | AJI58752 / CP009694                                    | +2                 | minus start Methionine                    |
| 4477                                 | 50S ribosomal protein L27                    | 50S-L27           | TOBA-04    | AFJ43684 / CP003402                                    | +2                 | minus start Methionine                    |
|                                      |                                              |                   |            |                                                        |                    |                                           |
| 5182-5185 [Li et al, [Seibold et al] | 50S ribosomal protein L34                    | 50S-L34           | Schu S4    | CAG44869 / AJ74994                                     |                    | none                                      |
| 7759-77601                           | 50S ribosomal protein L29                    | 50S-L29           | CCUG 19701 | ABZ86979 / CP000937                                    |                    | none                                      |
| 8079                                 | DNA-directed RNA polymerase $\Omega$ subunit | RNApolym $\Omega$ | U112       | CAG45336 / AJ749949                                    |                    | minus start Methionine plus dimethyl      |
| 8522                                 | phosphatase PAP2 family protein              | PAP2              | DSM 22475  | APD49887 / CP018093                                    | +3                 | plus trimethyl (start AA=L)               |
| 8923-8925                            | 50S ribosomal protein L27                    | 50S-L27           | CCUG 19701 | ABZ86366 / CP000937                                    |                    | minus start Methionine                    |
| 9380                                 | Histon-like protein form Beta                | HU-beta           | FSC 774    | QOG55061 / CP053850                                    |                    | none                                      |
| 9394-9396                            | Histon-like protein form Beta                | HU-beta           | CCUG 19701 | ABZ97761 / CP000937                                    |                    | none                                      |
| 9449                                 | Histon-like protein form Beta                | HU-beta           | Schu S4    | AJI60850 / CP009633                                    |                    | none                                      |
| 9476-9477                            | Histon-like protein form Beta                | HU-beta           | U112       | CAG45260 / AJ749949                                    |                    | none                                      |
| 10215                                | Chaperonin protein, groES                    | GroES             | FSC 774    | QOG55434 / CP053850                                    |                    | none                                      |
|                                      | Parvulin-like peptidylprolyl isomerase       | PPisom            | FSC 774    | QOG54986 / CP053850                                    |                    | none                                      |

BolA = bovine lymphocyte antigen; PAP Phosphatic acid phosphatase

<sup>a</sup>Matching gene determined with Tagident or Uniprot

<sup>b</sup>The protein and genome accessions are from the strains from which the biomarkers were selected

The genome sequence of each gene was translated to amino acid (AA) sequence to determine the mass, not the accession AA sequence

<sup>c</sup>sequence 391813..39188 complement CP053850 (almost identical to Hypothetical protein QEN42979, CP022952 *F. orientalis* strain FN0364)
